# Supplementary material for: Muscle Cell Fate Choice Requires the T-Box Transcription Factor Midline in Drosophila
Source: Oxford University Press journal article supplement (doi:10.1534/genetics.115.174300), 2015-01-21
Supplement: genetics.115.174300-2.pdf [file genetics.115.174300-2.pdf]

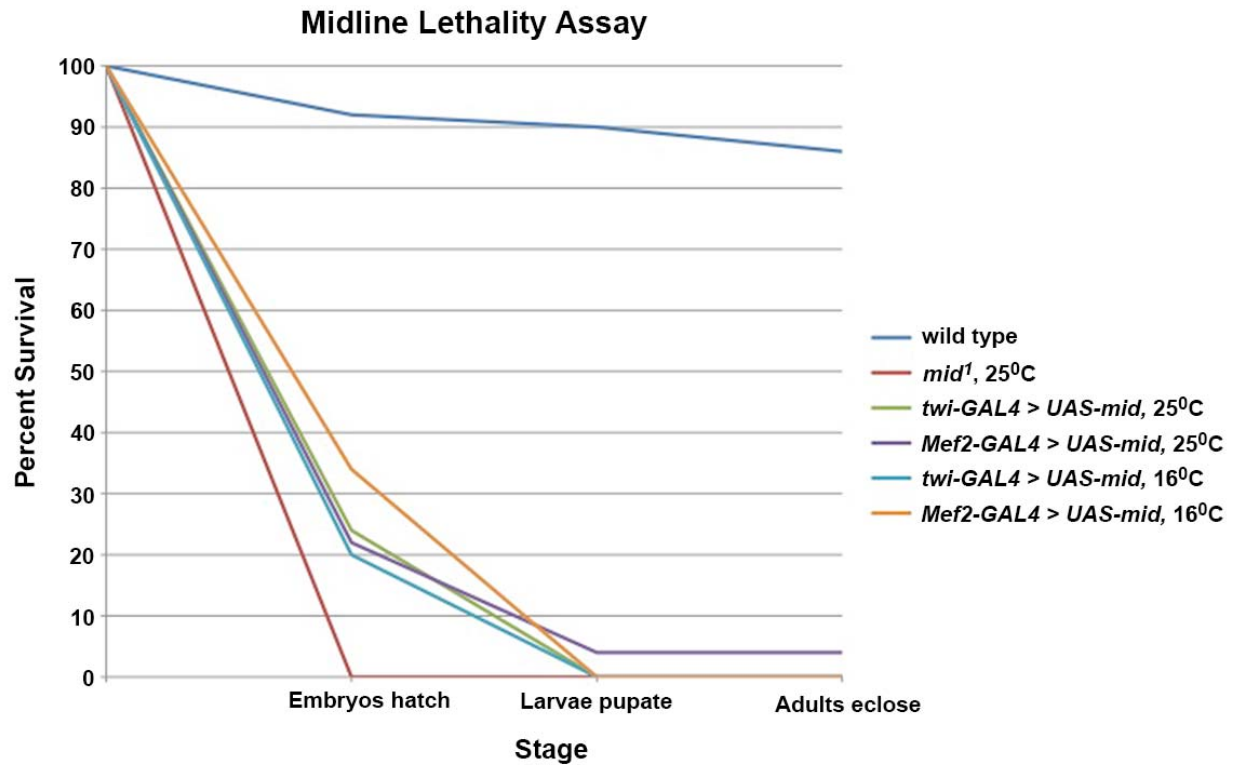

**Figure S4 Viability of Midline Loss and Gain.** Graph depicting viability of embryos, larvae, pupae and adults of the indicated genotypes, measured as a percent of survivors/total number of embryos selected. Fertilized embryos of the appropriate genotype were hand-selected using fluorescently-marked balancer chromosomes to identify homozygotes. Embryos were then transferred to a plate and monitored for hatching. First instar larvae were then transferred to a vial containing standard cornmeal media for the remainder of the experiment. For all genotypes, n=50.
