# Supplementary material for: Muscle Cell Fate Choice Requires the T-Box Transcription Factor Midline in Drosophila
Source: Oxford University Press journal article supplement (doi:10.1534/genetics.115.174300), 2015-01-21
Supplement: genetics.115.174300-3.pdf [file genetics.115.174300-3.pdf]

**Table S1 Quantification of Somatic Muscle Defects in *mid* Mutants**

|                                               | <b>% Affected Hemisegments</b> | <b>% Affected Embryos</b> |
|-----------------------------------------------|--------------------------------|---------------------------|
| <i>mid</i> <sup>1</sup>                       | 100                            | 100                       |
| <i>mid</i> <sup>los1</sup>                    | 100                            | 100                       |
| <i>mid</i> <sup>2</sup>                       | 100                            | 100                       |
| <i>mid</i> <sup>1</sup> / <i>Df(2L)BSC810</i> | 100                            | 100                       |
| wild type                                     | 13                             | 3                         |

Stage 16 embryos of the indicated genotypes were stained with an antibody against myosin heavy chain and scored for muscle defects. For all genotypes, five abdominal hemisegments A3-A7 were scored in 20 embryos, for a total of 100 hemisegments quantified.
