# Supplementary material for: Muscle Cell Fate Choice Requires the T-Box Transcription Factor Midline in Drosophila
Source: Oxford University Press journal article supplement (doi:10.1534/genetics.115.174300), 2015-01-21
Supplement: genetics.115.174300-4.pdf [file genetics.115.174300-4.pdf]

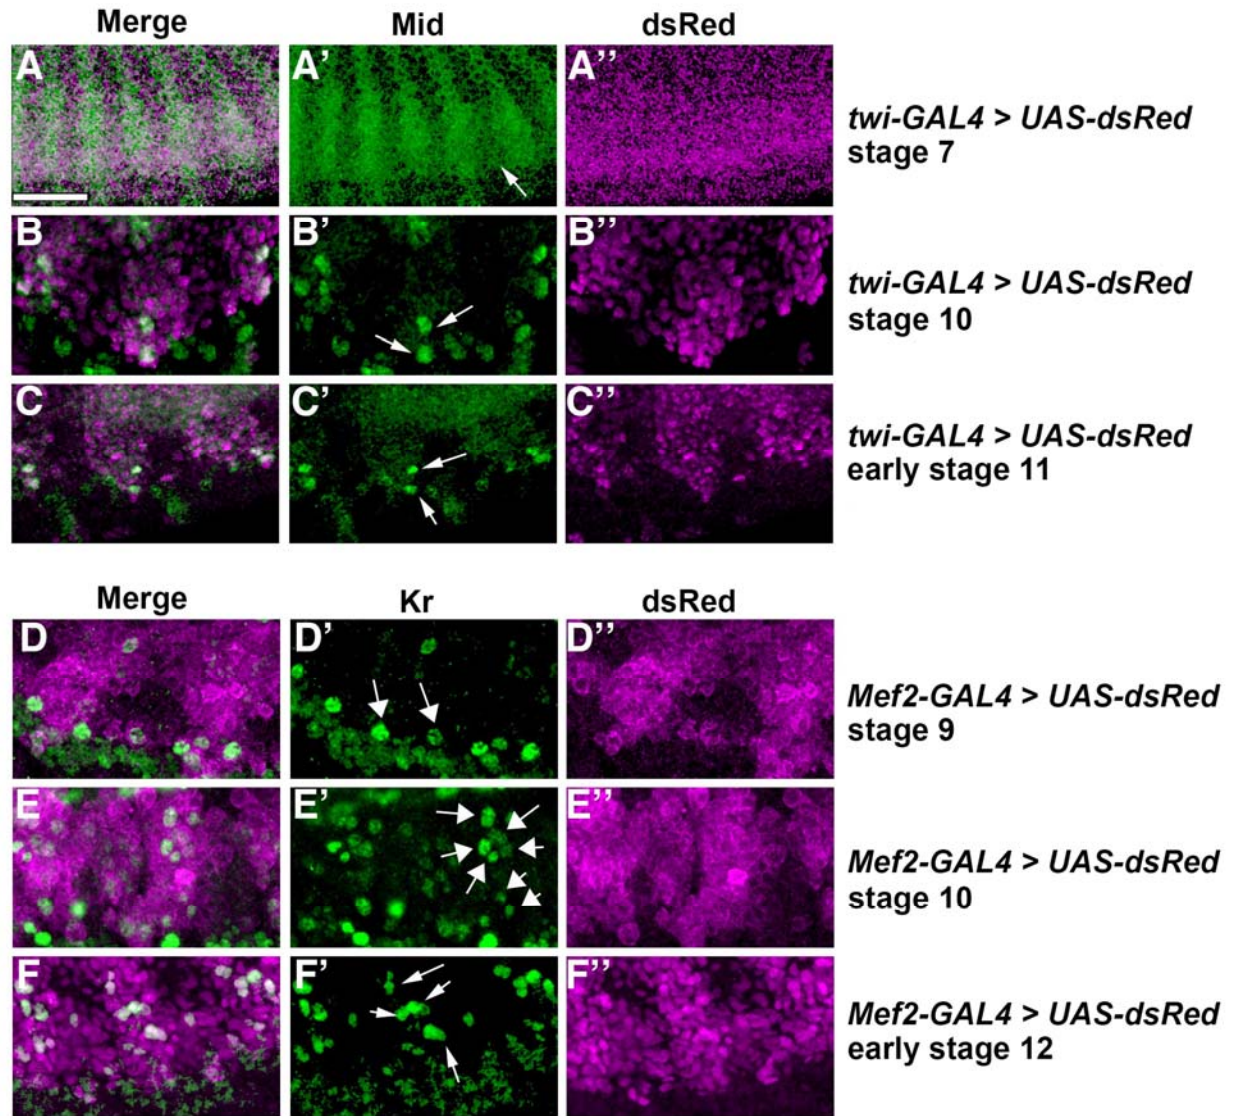

**Figure S3 Expression of GAL4 lines used in this study.** *twi-GAL4* and *Mef2-GAL4* are expressed during LT formation and development, and their expression overlaps with Mid. (A-A''') Panels show embryos in which *twi-GAL4* drove a *UAS-nuc::dsRed* construct. Embryos were stained with anti-dsRed (magenta) and anti-Mid (green). Arrow points to co-expression at stage 7. (B-B''') *twi-GAL4* > *UAS-nuc::dsRed* embryos at stage 10. Arrows point to the Mid-expressing progenitors. (C-C''') *twi-GAL4* > *UAS-nuc::dsRed* embryos at early stage 11. Arrows point to the Mid-expressing progenitors. (D-D''') *Mef2-GAL4* > *UAS-nuc::dsRed* embryos stained with anti-Kr (green) and anti-dsRed (magenta). Arrows point to Kr-expressing founders at late stage 11.
