# Supplementary material for: Muscle Cell Fate Choice Requires the T-Box Transcription Factor Midline in Drosophila
Source: Oxford University Press journal article supplement (doi:10.1534/genetics.115.174300), 2015-01-21
Supplement: genetics.115.174300-5.pdf [file genetics.115.174300-5.pdf]

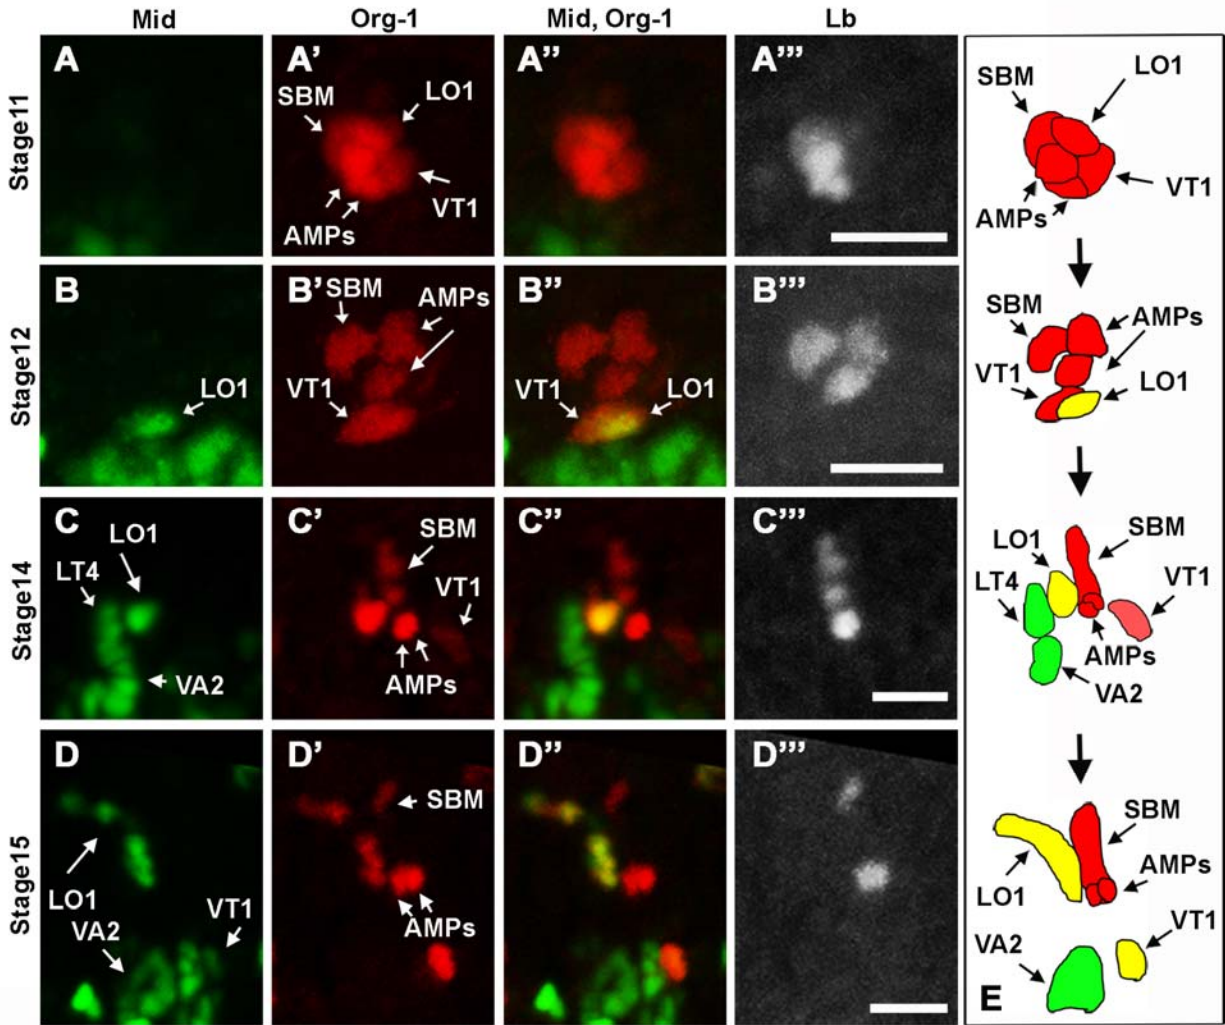

**Figure S2** Mid expression is detected in the LO1/VT1 lineage but is absent from the SBM/AMP lineage. Lateral view of a single abdominal hemisegment in embryos immunostained for Mid, Org-1 and Lb. (A) At stage 11, Org-1 and Lb expressing cells are clearly detectable. (B-D) Mid is visible with Org-1 in the FC and growing myotube for LO1 but is not detected in the sibling VT1 muscle until stage 15. Note that Mid is never detected in the SBM, which is marked by expression of both Org-1 and Lb, despite robust Mid in other FCs and myotubes. Nevertheless, as discussed in the text, the SBM is lost in *mid* and *mid*, *H15* mutants and ectopic Lb-expressing cells are detected upon pan-mesodermal expression of Mid. Scale bar: 10 $\mu$ m. (E) Schematic representation of Mid, Org-1 and Lb expression during LO1, VT1 SBM and AMPs development.
