# Supplementary material for: Muscle Cell Fate Choice Requires the T-Box Transcription Factor Midline in Drosophila
Source: Oxford University Press journal article supplement (doi:10.1534/genetics.115.174300), 2015-01-21
Supplement: genetics.115.174300-6.pdf [file genetics.115.174300-6.pdf]

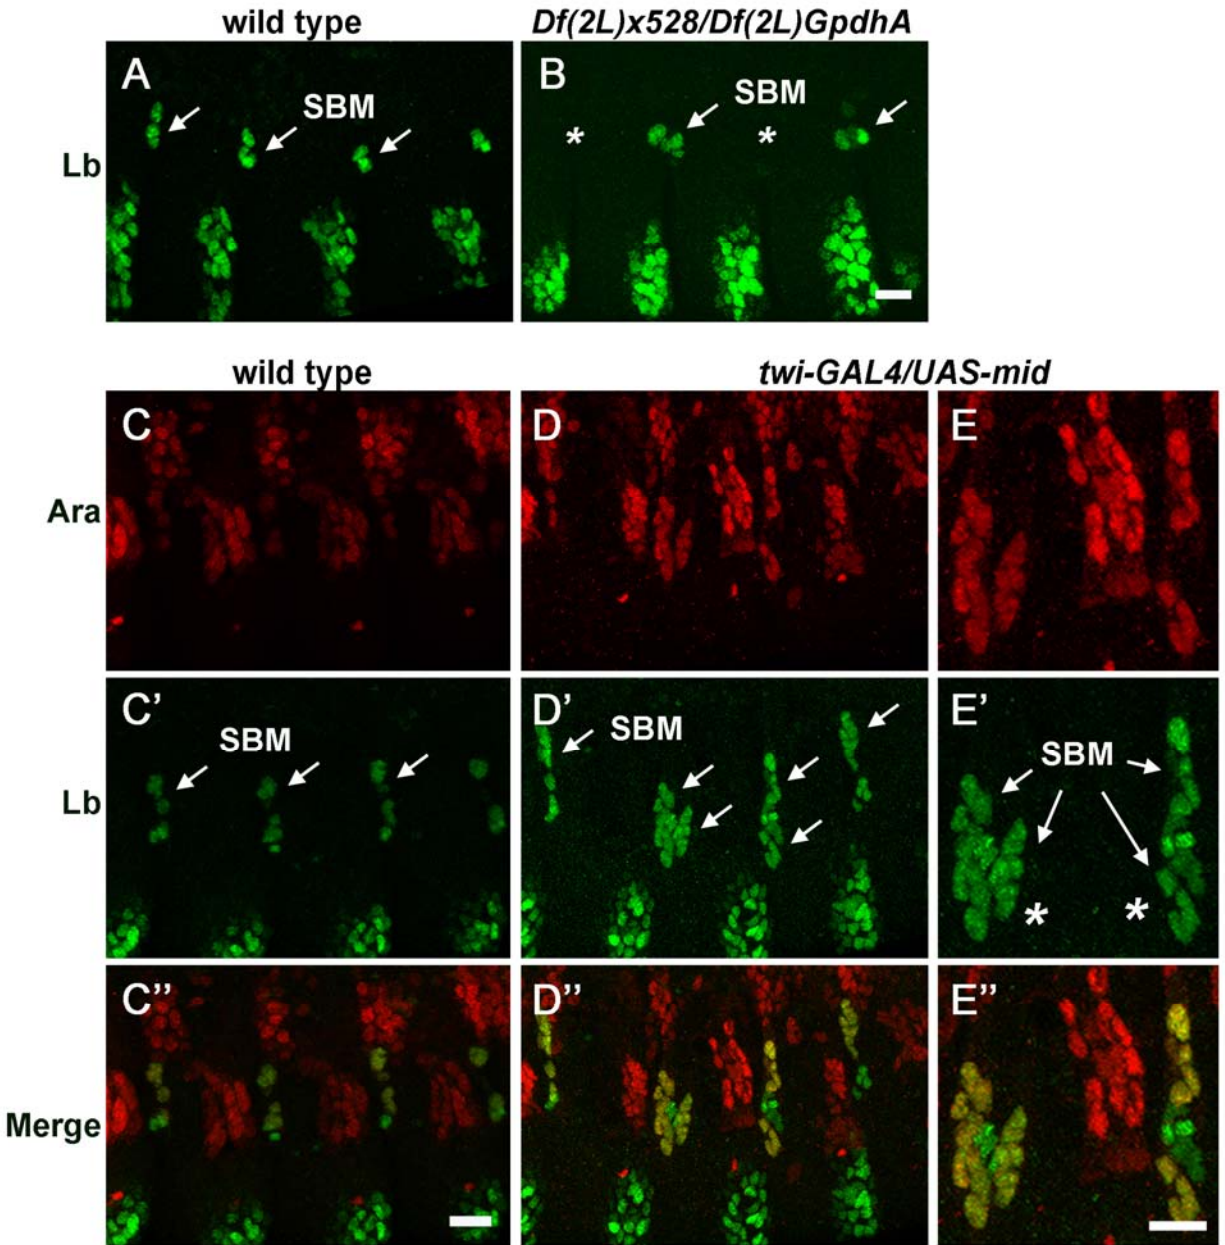

**Figure S6 Founder cells for the SBM is impacted by the loss of *mid* and pan-mesodermal expression of Mid generates extra Lb- expressing cells.** Lateral views of abdominal hemisegments from stage 14 (A-B) and stage 15 (C-E) embryos immunostained for Lb (green, A-B, and C'-E'), Ara (red, C-E). (A, C-C'') wild type. (B) *Df(2L)x528/Df(2L)GpdhA* which lacks both *mid* and *H15* and (D-E) *twi-GAL4/UAS-mid*. Asterisks indicate missing FCs for SBM (B). The presence of ectopic Lb-expressing muscles upon pan-mesodermal expression of Mid are clearly visible in some segments. (E-E'') Enlarged view from D-D'' (white box). Note that additional Lb and Ara expressing syncytia are apparent (asterisks). Scale bar: 10µm.
