# Supplementary material for: Muscle Cell Fate Choice Requires the T-Box Transcription Factor Midline in Drosophila
Source: Oxford University Press journal article supplement (doi:10.1534/genetics.115.174300), 2015-01-21
Supplement: genetics.115.174300-7.pdf [file genetics.115.174300-7.pdf]

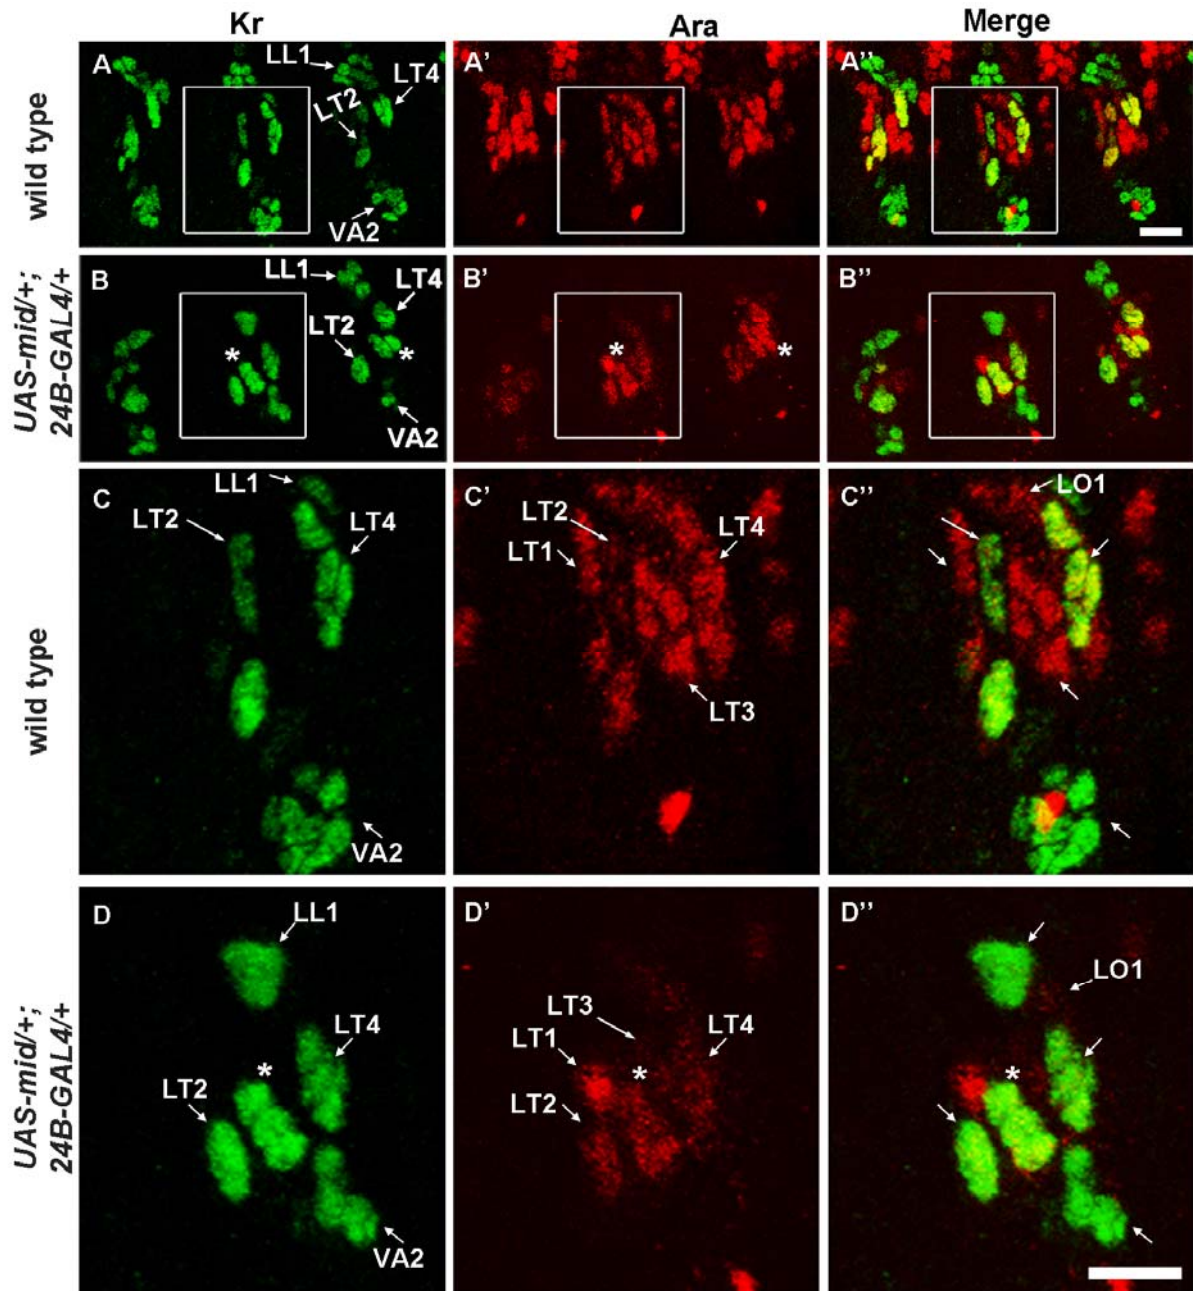

**Figure S5** Extra Kr-expressing cells generated by pan-mesodermal expression of Mid also express Ara. Lateral views of stage 15 embryos immunostained for Kr and Ara. (A) wild type and (B) *UAS-mid/+; 24B-GAL4/+*. Extra Kr positive cells observed upon pan-mesodermal expression of Mid also expressed the LT marker Ara (asterisks). (C-C'') Enlarged view from A (white box). (D-D'') Enlarged view from B (white box). These data indicated the LT-like identity of the ectopic Kr-expressing cell generated by ectopic Mid. Scale bar: 10 $\mu$ m.
