# Supplementary material for: Muscle Cell Fate Choice Requires the T-Box Transcription Factor Midline in Drosophila
Source: Oxford University Press journal article supplement (doi:10.1534/genetics.115.174300), 2015-01-21
Supplement: genetics.115.174300-8.pdf [file genetics.115.174300-8.pdf]

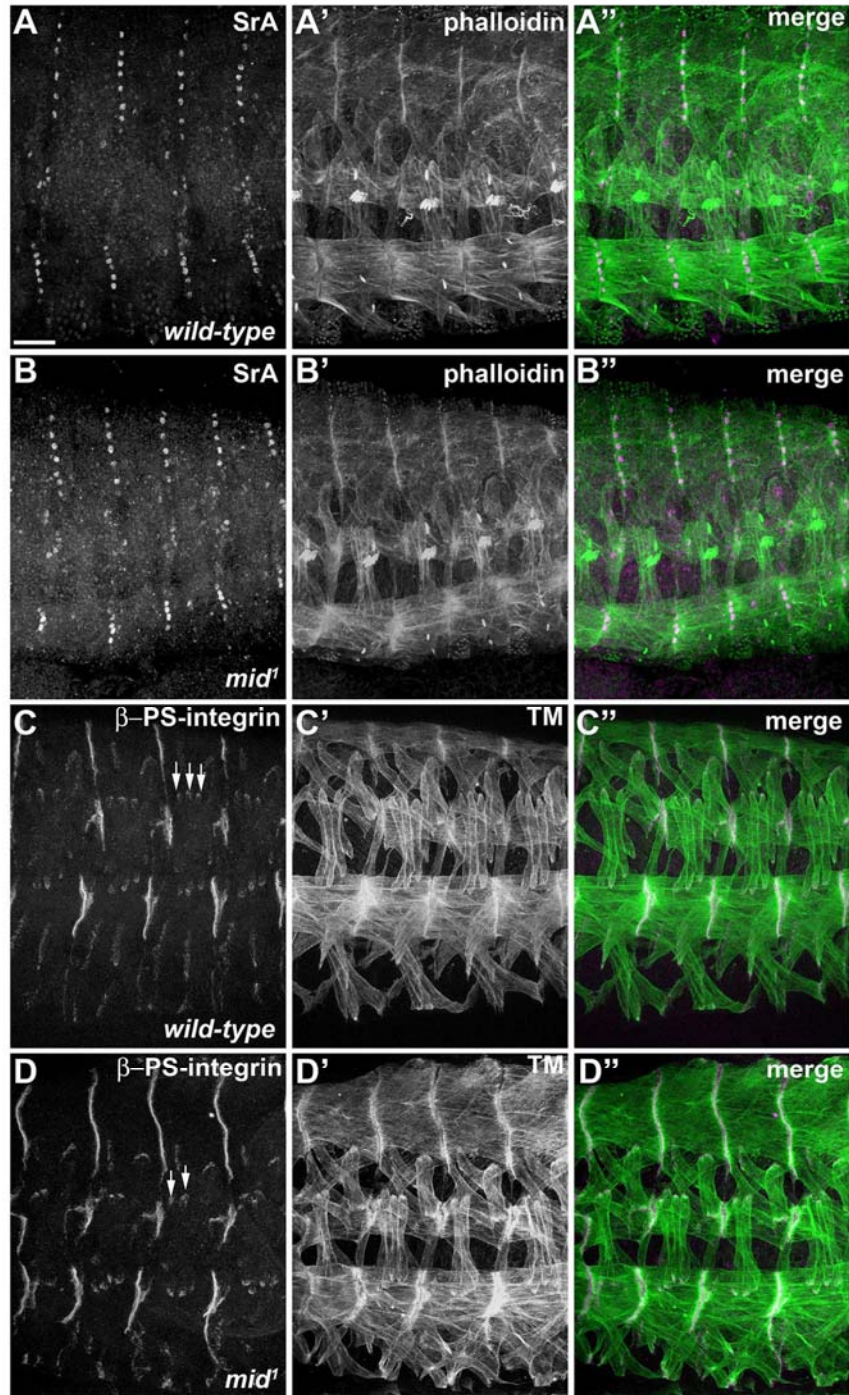

**Figure S1 Tendon cells are specified and  $\beta$ -PS-Integrin marks attachment sites in *mid* mutants.** Lateral views of fixed stage 16 embryos. (A-B'') Embryos immunostained for StripeA (SrA - white in single channel, magenta in merge) and phalloidin (white in single channel, green in merge), to mark the actin cytoskeleton. (C-D'') Embryos immunostained for  $\beta$ -PS-Integrin (white in single channel, magenta in merge) and tropomyosin (tropo - white in single channel, green in merge). (A-A'', C-C'') wild type embryo. (B-B'', D-D'') *mid*<sup>1</sup> homozygote. Arrows point to LT muscle attachment. Scale bar: 25 $\mu$ m.
